# Supplementary material
Source: PubMed Central journal article supplement (PMC4762415)
Supplement: supp_WNL.0000000000002369_588.pdf [file supp_WNL.0000000000002369_588.pdf]

# Is normal pressure hydrocephalus becoming less idiopathic?

Neill R. Graff-Radford,  
MBBCh, FRCP

Correspondence to  
Dr. Graff-Radford:  
Graff-radford.neill@mayo.edu

*Neurology*® 2016;86:588–589

Normal pressure hydrocephalus (NPH) has posed a challenge to neurologists for 5 decades.<sup>1</sup> Difficulties in understanding its pathophysiology have hindered efforts to diagnose it and to develop a better approach to selecting patients for shunt surgery.

We know that many patients with NPH have CSF absorption difficulty as measured by resistance to CSF outflow ( $R_{out}$ ).<sup>2</sup> The problem is that many with normal  $R_{out}$  also improve with shunt surgery, so other factors are important in NPH pathogenesis. We also know that more than 10% of patients presenting clinically with NPH have congenital chronic hydrocephalus. Congenital hydrocephalus may become symptomatic in older age, as evidenced by the fact that more than 10% of patients with NPH have a head size above the 98th percentile.<sup>3,4</sup>

There is now increasing evidence that vascular risk factors are associated with hydrocephalus. As long ago as 1959, Bering demonstrated that intraventricular pulse pressure can induce the development of hydrocephalus. He showed that, in a dog model of hydrocephalus, ligation of the choroid plexus in one ventricle (removing the intraventricular pulse pressure in that ventricle) produced hydrocephalus in only the other ventricle. This observation has been approximated in humans recently. In the Atherosclerosis Risk in Communities Study, ventricle size was measured on 2 brain MRI scans 10 years apart. Baseline systolic blood pressure and pulse pressure were associated with increased ventricular enlargement.<sup>5</sup> There are several other reports that indicate an association of hypertension, diabetes, and heart disease with NPH.<sup>6–9</sup>

The important question is whether persons who have normal  $R_{out}$  but vascular risk factors improve with shunt surgery; this was addressed in the only double-blind, randomized, prospective treatment study in NPH.<sup>10</sup> Patients ( $n = 14$ ) who did not have an absorption problem ( $R_{out}$  was normal), but had severe brain white matter change and vascular risk factors, underwent shunting. Half had the shunt tube tied in the neck and left closed for 3 months. Those with an open shunt improved in the first 3 months and those who had occluded shunts did not, but when the shunt was opened, they too improved.

In this issue of *Neurology*®, vascular risk factors associated with NPH in a population-based study are described.<sup>11</sup> The authors found that, of 1,235 persons older than 70 years, 55 had imaging findings of NPH and, of these, 26 fulfilled the International Guidelines<sup>12</sup> for the diagnosis of NPH. Each case was matched to 5 controls on age, sex, and study cohort. Radiologic hydrocephalus was associated with hypertension (odds ratio [OR] 2.7; 95% confidence interval [CI]: 1.1–6.8), moderate to severe white matter lesions (OR 6.5; 95% CI: 2.1–20.3), and diabetes mellitus (OR 4.3; 95% CI: 1.1–16.3). Important strengths of this population-based study are that the controls came from the same population and exposure data were collected prospectively. An important limitation is that this is a cross-sectional study, so we do not know whether white matter changes cause hydrocephalus, hydrocephalus causes white matter changes, or it is bidirectional.

The associations between vascular risk factors and radiologic or clinical NPH have important implications. Perhaps early effective intervention treating vascular risk factors may reduce the incidence of NPH. Vascular risk factors are clearly associated with NPH, but further prospective studies will be needed to show whether they are causative.

## STUDY FUNDING

No targeted funding reported.

## DISCLOSURE

The author reports no disclosures relevant to the manuscript. Go to [Neurology.org](http://Neurology.org) for full disclosures.

## REFERENCES

1. Adams RD, Fisher CM, Hakim S, Ojemann RG, Sweet WH. Symptomatic occult hydrocephalus with “normal” cerebrospinal-fluid pressure: a treatable syndrome. *N Engl J Med* 1965;273:117–126.
2. Boon AJ, Tans JT, Delwel EJ, et al. Dutch Normal-Pressure Hydrocephalus Study: the role of cerebrovascular disease. *J Neurosurg* 1999;90:221–226.
3. Krefft TA, Graff-Radford NR, Lucas JA, Mortimer JA. Normal pressure hydrocephalus and large head size. *Alzheimer Dis Assoc Disord* 2004;18:35–37.
4. Wilson RK, Williams MA. Evidence that congenital hydrocephalus is a precursor to idiopathic normal pressure

See page 592

From the Mayo Clinic, Jacksonville, FL.

- hydrocephalus in only a subset of patients. *J Neurol Neurosurg Psychiatry* 2007;78:508–511.
5. Graff-Radford NR, Knopman DS, Penman AD, Coker LH, Mosley TH. Do systolic BP and pulse pressure relate to ventricular enlargement? *Eur J Neurol* 2013;20:720–724.
  6. Graff-Radford NR, Godersky JC. Idiopathic normal pressure hydrocephalus and systemic hypertension. *Neurology* 1987;37:868–871.
  7. Krauss JK, Regel JP, Vach W, Droste DW, Borremans JJ, Mergner T. Vascular risk factors and arteriosclerotic disease in idiopathic normal-pressure hydrocephalus of the elderly. *Stroke* 1996;27:24–29.
  8. Casmiro M, D'Alessandro R, Cacciatore FM, Daidone R, Calbucci F, Lugaresi E. Risk factors for the syndrome of ventricular enlargement with gait apraxia (idiopathic normal pressure hydrocephalus): a case-control study. *J Neurol Neurosurg Psychiatry* 1989;52:847–852.
  9. Eide PK, Pripp AH. Increased prevalence of cardiovascular disease in idiopathic normal pressure hydrocephalus patients compared to a population-based cohort from the HUNT3 survey. *Fluids Barriers CNS* 2014;11:19.
  10. Tisell M, Tullberg M, Hellstrom P, Edsbacke M, Hogfeldt M, Wikkelsö C. Shunt surgery in patients with hydrocephalus and white matter changes. *J Neurosurg* 2011;114:1432–1438.
  11. Jaraj D, Agerskov S, Rabiei K, et al. Vascular factors in suspected normal pressure hydrocephalus: a population-based study. *Neurology* 2016;86:592–599.
  12. Relkin N, Marmarou A, Klinge P, Bergsneider M, Black PM. Diagnosing idiopathic normal-pressure hydrocephalus. *Neurosurgery* 2005;57:S4–S16; discussion ii–v.
